# Supplementary material for: A string of nickel hexacyanoferrate nanocubes coaxially grown on a CNT@bipolar conducting polymer as a high-performance cathode material for sodium-ion batteries
Source: Royal Society of Chemistry journal article supplement (doi:10.1039/c6nr08765e), 2016-12-09
Supplement: c6nr08765e1.pdf [file c6nr08765e1.pdf]

## Supporting Information

### **A String of Nickel Hexacyanoferrate Nanocubes Coaxially Grown on CNTs@Bipolar Conducting Polymer as a High-Performance Cathode Material for Sodium-Ion Batteries**

Zhongde Wang<sup>a\*</sup>, Ye Liu<sup>a</sup>, Zhijun Wu<sup>a</sup>, Guoqing Guan<sup>b</sup>, Ding Zhang<sup>a</sup>, Huayan Zheng<sup>a</sup>, Shoudong Xu<sup>a</sup>, Shibin Liu<sup>a</sup> and Xiaogang Hao<sup>a</sup>

<sup>a</sup>*Department of Chemical Engineering, Taiyuan University of Technology, Taiyuan 030024, China*

<sup>b</sup>*North Japan Research Institute for Sustainable Energy (NJRISE), Hirosaki University, 2-1-3, Matsubara, Aomori 030-0813, Japan*

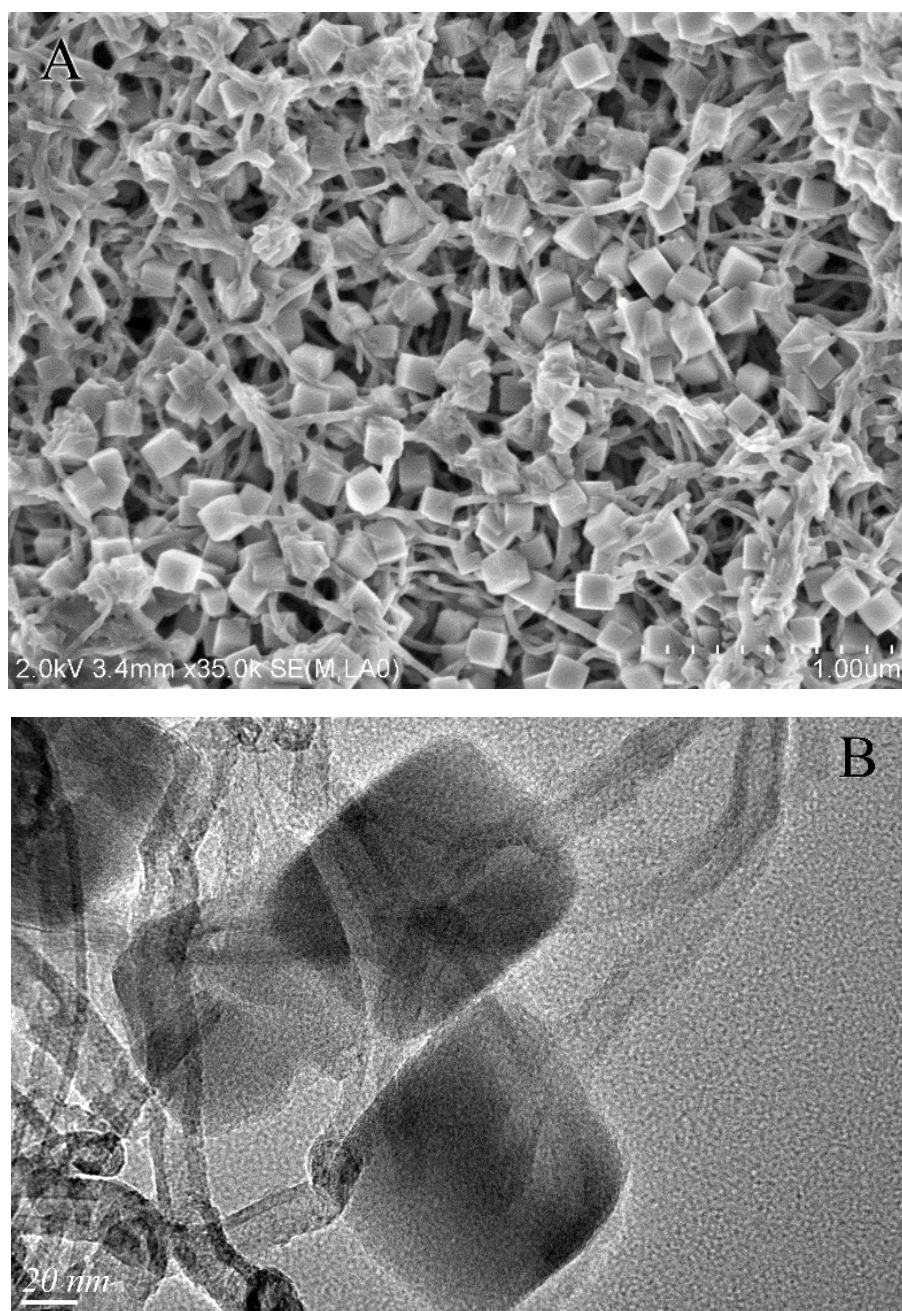

Figure S1. A) SEM images of the as-prepared sting-type CNTs@NiHCF-BCP nanohybrid. B) High-magnification TEM image of CNTs@NiHCF-BCP

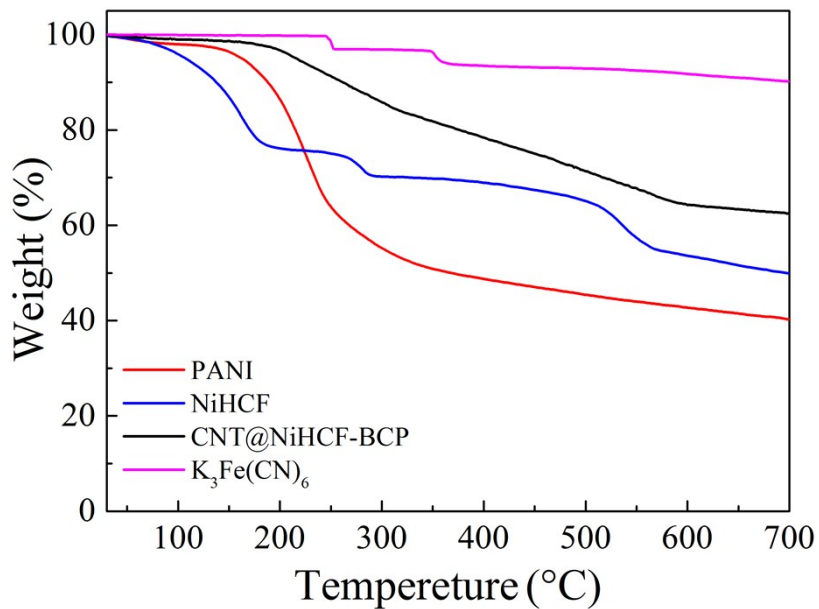

Figure S2. TGA curves of PANI, NiHCF, K<sub>3</sub>Fe(CN)<sub>6</sub> and CNTs@NiHCF-BCP.

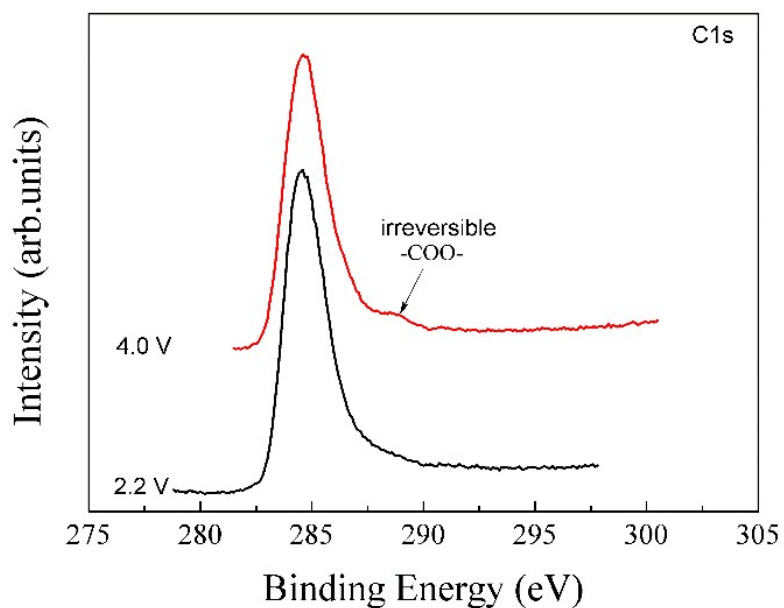

Figure S2. C<sub>1s</sub> of XPS in the CNTs@NiHCF-BCP electrode for sodium-ion batteries at different voltages during charging.

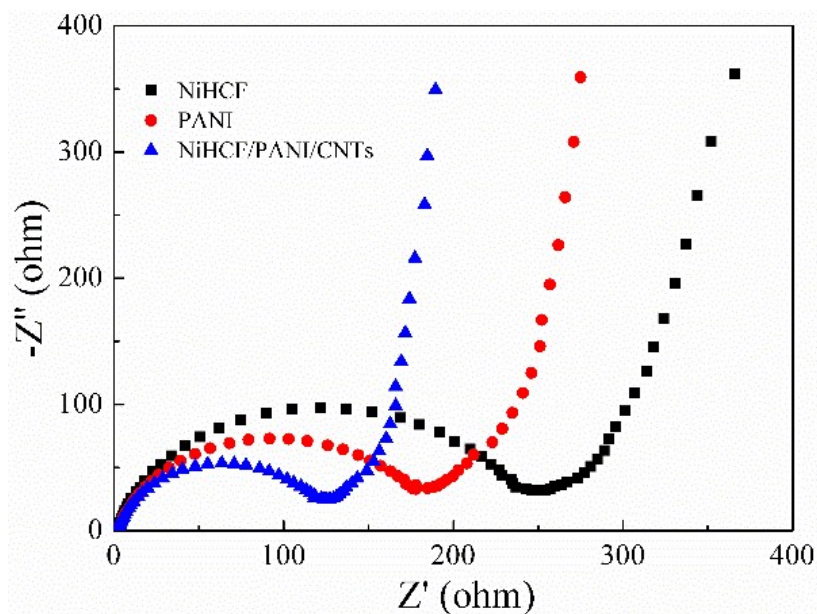

Figure S3. EIS spectra of the cells at the fifth cycle in a fully charged state over the frequency range of 0.01–100 kHz.

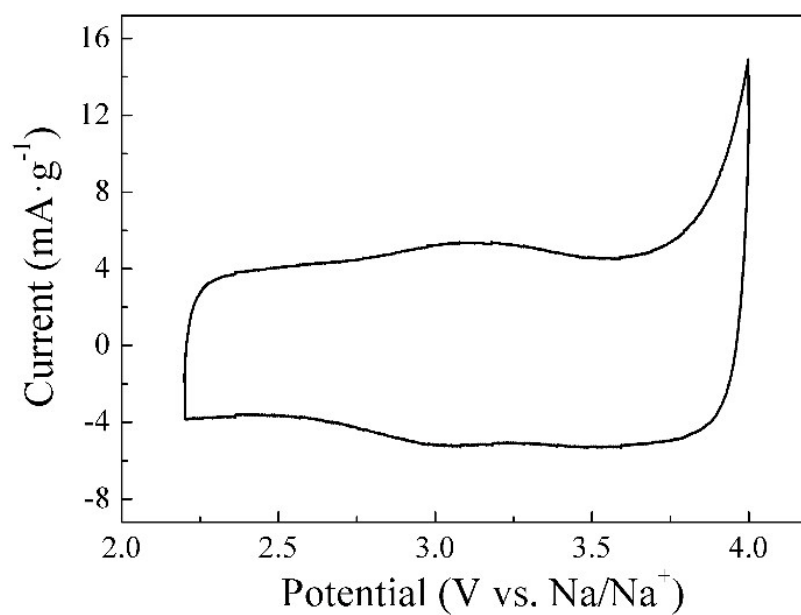

Figure S4. CV curve of the the as-prepared PANI electrode with a scan rate of 0.1 mV·s<sup>-1</sup>

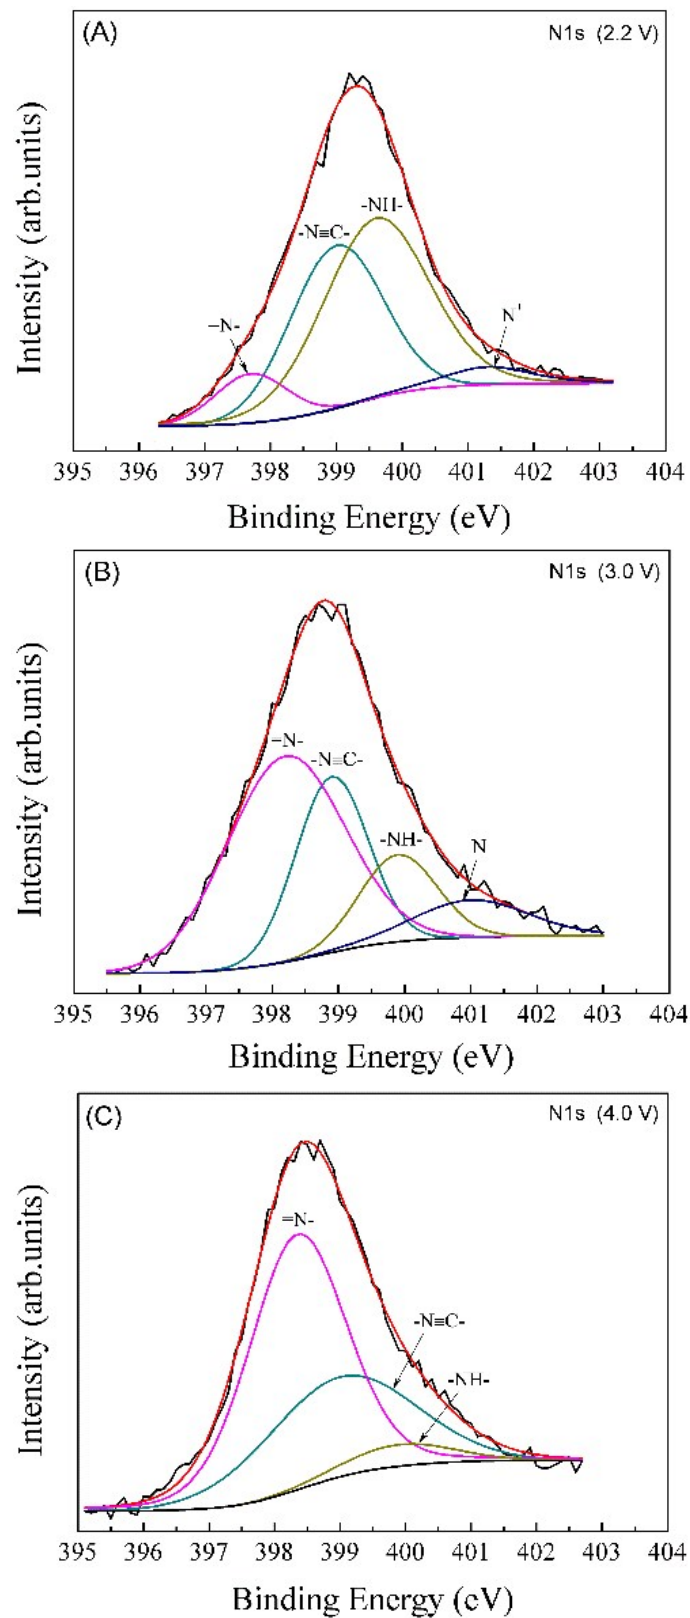

Figure S5. A-C)  $N_{1s}$  of XPS in the CNTs@NiHCF-BCP electrode for sodium-ion batteries at different voltages during charging.

Table S1. Elemental analysis by EDS for the CNTs@NiHCF-BCP nanohybrid.

| <b>Elt.</b> | <b>Line</b> | <b>Intensity<br/>(c/s)</b> | <b>Atomic<br/>Ratio</b> | <b>Conc</b> | <b>Units</b> | <b>Error<br/>2-sig</b> | <b>MDL<br/>3-sig</b> |       |
|-------------|-------------|----------------------------|-------------------------|-------------|--------------|------------------------|----------------------|-------|
| C           | Ka          | 144.30                     | 1.0000                  | 69.305      | wt.%         | 1.295                  | .297                 |       |
| N           | Ka          | 2.97                       | .2177                   | 17.596      | wt.%         | 14.048                 | 3.865                |       |
| Fe          | Ka          | 27.94                      | .0268                   | 8.635       | wt.%         | 3.209                  | .292                 |       |
| Ni          | Ka          | 10.40                      | .0132                   | 4.464       | wt.%         | 5.760                  | .320                 |       |
|             |             |                            |                         | 100.000     | wt.%         |                        |                      | Total |

a) 20.0 kV; Takeoff Angle: 35.0°; Elapsed Livetime: 60
